# Supplementary material for: A nanobody:GFP bacterial platform that enables functional enzyme display and easy quantification of display capacity
Source: PubMed Central journal article supplement (PMC4855350; doi:10.1186/s12934-016-0474-y), 2016-05-03

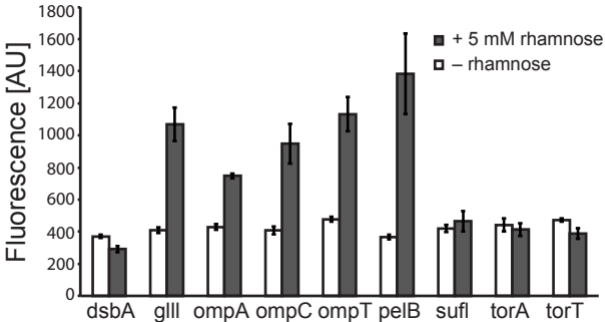

Supplement: 12934_2016_474_MOESM3_ESM.pdf [file 12934_2016_474_MOESM3_ESM.pdf]
