# Supplementary material for: A nanobody:GFP bacterial platform that enables functional enzyme display and easy quantification of display capacity
Source: PubMed Central journal article supplement (PMC4855350; doi:10.1186/s12934-016-0474-y), 2016-05-03
Supplement: 12934_2016_474_MOESM5_ESM.pdf [file 12934_2016_474_MOESM5_ESM.pdf]

**Table S1. Oligos used in this study**

| Oligo ID   | Sequence (5' to 3')                                            |
|------------|----------------------------------------------------------------|
| Lpp-F      | ATATACCAUGAAAGCTACTAAACTGGTACTGG                               |
| Lpp-OmpA-R | aattccCUGATCGATTTTAGCGTTGCTGGAG                                |
| OmpAR      | ACCCGGACCUCGTTGTCCGGACGAGTGCCGATG                              |
| Lpp-OmpA-F | AGggaatUAACCCGTATGTTGGCTTTGAAATGGGTAC                          |
| pGFP_1     | AGGTCCGGGUATGAGCAAAGGAGAAGAACTTTTCAC                           |
| pGFP_2     | ATGGTATAUCTCCTTCTTAAAGTTAAACAAAATTATTTCTAG                     |
| GFPgenR    | ATCCTGGCUATTTGTAGAGCTCATCCATGCCATG                             |
| 525        | ATGGTATAUTCCTCCTGAATTTCAATTACGAC                               |
| 526        | AGCCAGGAUAGAGTCGACCTGCAGGCATG                                  |
| 527        | ATATACCAUGAAATACCTATTGCCTACGGCAG                               |
| 528        | ATCCTGGCUAGAAACGAATCTGTATTTTAATTTGTCCGGA<br>TTTTTG             |
| 855        | ATaCCCGGACCUCGTTGTCCGGACGAGTG                                  |
| 856        | AGCCAGGAUAGAGTCGACCTGCAGGCATG                                  |
| 857        | AGGTCCGGGtAUGGCTCAGGTCCA ACTGGT CG                             |
| 858        | ATCCTGGCUAGTGGTGGTGGTGGTGATGATG                                |
| 1715       | AGCAAGCTUGCGGCCCCACGTCCACCAACACCG                              |
| 1716       | AGCCATATUTGCCATACTAATTGCGGCT                                   |
| 1717       | AATATGGCUCAGGTCCA ACTGGT CGAATC                                |
| 1718       | AAGCTTGCUGCTAACCGTGACCTGCGT                                    |
| 1889       | AGTCCAGGCAGUATGGCTCAGGTCCA ACTGGT CGAATC                       |
| 1890       | accaggaccgcuTCCGTTGTCCGGACGAG                                  |
| 1891       | AGTCCAGGCAGUtgaAGCCAGGATAGAGTCGACCTG                           |
| 1892       | accaggaccgcuGGCCGCAAGCTTGCTG                                   |
| 1895       | accaggaccgcuAATTGCGGCTGAATTGTGATCGG                            |
| 1898       | agcggtcttggguATGGCCGCGCCGGGCAAG                                |
| 1899       | actgcctggacuTTGAACGCCGGCCAGGCTGG                               |
| 2148       | ATATAcCuATACCATGAAAGCTACTAAACTGG                               |
| 2152       | ACCTCAGCutcaGGCCGCAAGCTTGCT                                    |
| 2155       | AGGTATAuCTCCTTCTTAAAGTTAAAC                                    |
| 2197       | AGCTGAGGuCGCCTCAGC                                             |
| 2235       | TAGGTACGAACCTCGATTGACGgctcttctaccTCAGGCCGCAA<br>GCTTGCTG       |
| 2236       | TAGGTACGAACCTCGATTGACGgctcttctaccCTATCCTGGCTA<br>GAAACGAATCTG  |
| 2334       | TACACGTA CT TAGTCGCTGAAgctcttctatgCATCACCATCAC<br>CATCACGCG    |
| 2539       | TACACGTA CT TAGTCGCTGAAgctcttctatgaTTAACCCGTATG<br>TTGGCTTTGAA |
| 2647       | ATTCCGcCuGGTGGTGCCGTTCTATAGCCATAGCATGCATC<br>ACCATCACCATCACGC  |
| 2648       | AGCGGAAuCGCGAACAGCAGTTTTTTCATGGTATATTCCT<br>CCTGAATTTTC        |
