# Supplementary material for: A nanobody:GFP bacterial platform that enables functional enzyme display and easy quantification of display capacity
Source: PubMed Central journal article supplement (PMC4855350; doi:10.1186/s12934-016-0474-y), 2016-05-03
Supplement: 12934_2016_474_MOESM6_ESM.pdf [file 12934_2016_474_MOESM6_ESM.pdf]

**Table S2. Plasmids used in this study**

| <b>Plasmid</b>            | <b>Reference</b> |
|---------------------------|------------------|
| pK                        | [33]             |
| pK:C-IgAP                 | This study       |
| pK:LppOmpA-GFP            | This study       |
| pGFP                      | [54]             |
| pKa:LppOmpA-NB            | This study       |
| pKa:NB-C-IgAP             | This study       |
| pKa:Lpp-OmpA-NB-chiA      | This study       |
| pKa:LppOmpA-chiA-NB       | This study       |
| pKa:chiA-NB-C-IgAP        | This study       |
| pCDF_sl3m:Ptrc            | [56]             |
| pCDF_sl3m:Ptrc-LppOmpA-NB | This study       |
| pD881                     | DNA2.0           |
| pD881:dsbAss-ChiA-NB-AT   | This study       |
| pD881:gIIIss-ChiA-NB-AT   | This study       |
| pD881:ompAss-ChiA-NB-AT   | This study       |
| pD881:ompCss-ChiA-NB-AT   | This study       |
| pD881:ompTss-ChiA-NB-AT   | This study       |
| pD881:pelBss-ChiA-NB-AT   | This study       |
| pD881:sufIss-ChiA-NB-AT   | This study       |
| pD881:torAss-ChiA-NB-AT   | This study       |
| pD881:torTss-ChiA-NB-AT   | This study       |
| pD881:dsbAss-OmpA-ChiA-NB | This study       |
| pD881:gIIIss-OmpA-ChiA-NB | This study       |
| pD881:ompAss-OmpA-ChiA-NB | This study       |
| pD881:ompCss-OmpA-ChiA-NB | This study       |
| pD881:ompTss-OmpA-ChiA-NB | This study       |
| pD881:pelBss-OmpA-ChiA-NB | This study       |
| pD881:sufIss-OmpA-ChiA-NB | This study       |
| pD881:torAss-OmpA-ChiA-NB | This study       |
| pD881:TorT-OmpA-ChiA-NB   | This study       |
| pKa_gIII_chi-NB-AT        | This study       |
